# Supplementary material
Source: HighWire-hosted journal article supplement (https://erj.ersjournals.com/content/54/2/1901026)
Supplement: inline-supplementary-material-2 [file inline-supplementary-material-2.pdf]

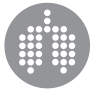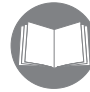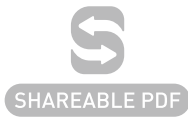

# Specific challenge testing for occupational asthma: revised handbook

Hille Suojalehto<sup>1</sup>, Katri Suuronen<sup>1</sup> and Paul Cullinan<sup>2</sup>

**Affiliations:** <sup>1</sup>Finnish Institute of Occupational Health, Helsinki, Finland. <sup>2</sup>Occupational and Environmental Medicine, Imperial College School of Medicine, National Heart and Lung Institute, London, UK.

**Correspondence:** Hille Suojalehto, Finnish Institute of Occupational Health, Occupational Medicine Team, Topeliksenskatu 41 a A, PO Box 40, FI-00032 Työterveyslaitos, Finland. E-mail: hille.suojalehto@ttl.fi

 @ERSpublications

**Specific inhalation challenge is considered a reference standard in the diagnosis of occupational asthma. An updated handbook of challenge techniques for a large number of sensitising agents from 11 European centres is now available.** <http://bit.ly/2XVpW1P>

**Cite this article as:** Suojalehto H, Suuronen K, Cullinan P. Specific challenge testing for occupational asthma: revised handbook. *Eur Respir J* 2019; 54: 1901026 [<https://doi.org/10.1183/13993003.01026-2019>].

This single-page version can be shared freely online.

When undertaken carefully, and in experienced hands, specific inhalation challenge (SIC) testing is widely considered to be the reference standard in the diagnosis of occupational asthma. In 2013 the European Respiratory Society commissioned a pan-European task force to produce standards for the conduct and interpretation of SIC with the aim of sharing expertise among those centres who offer the service and with centres who wish to develop a new service. The findings and recommendations of the taskforce were published in the *European Respiratory Journal* [1].
